# Supplementary material for: Redox biology of Mycobacterium tuberculosis H37Rv: protein-protein interaction between GlgB and WhiB1 involves exchange of thiol-disulfide
Source: PubMed Central journal article supplement (PMC2631452; doi:10.1186/1471-2091-10-1), 2009-01-05

# Additional file 1

Figure. 1

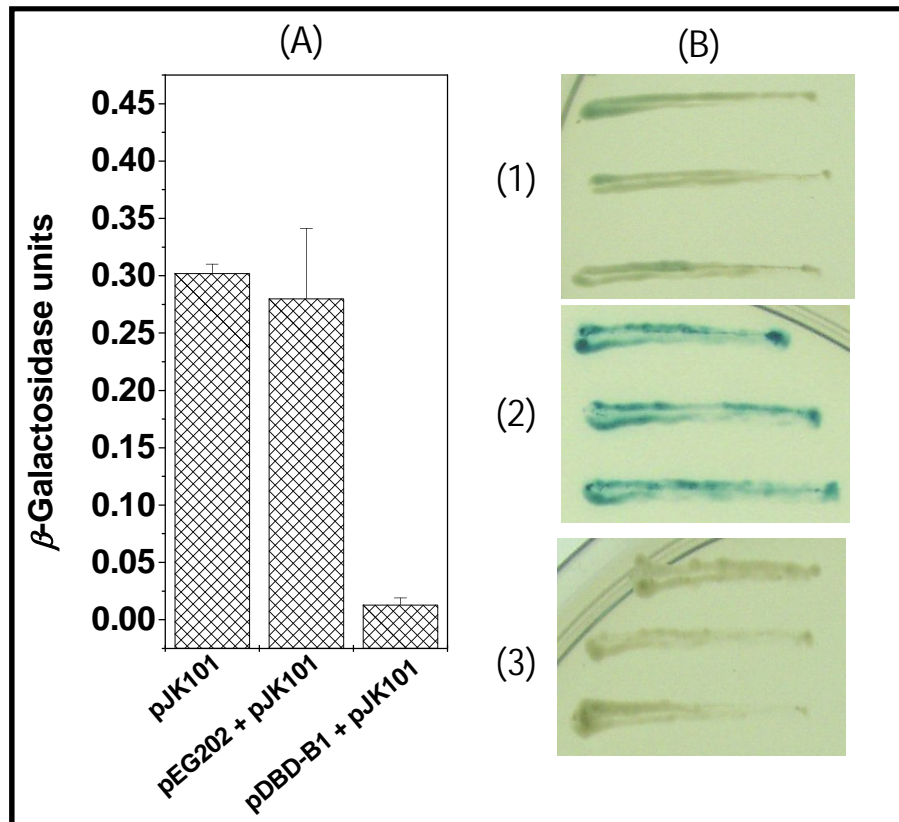

**Figure. 2**

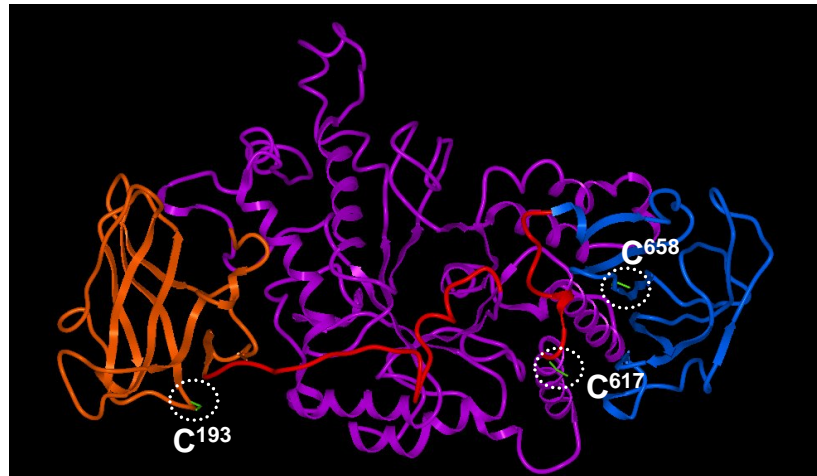

**Figure. 3**

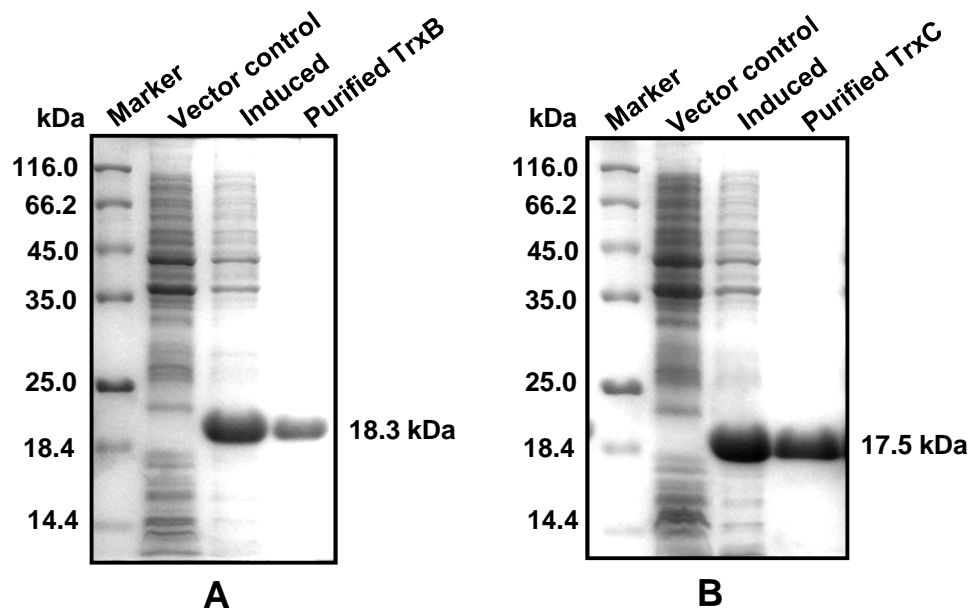

Supplement: 1471-2091-10-1-S1.pdf [file 1471-2091-10-1-S1.pdf]
