# Supplementary material for: Redox biology of Mycobacterium tuberculosis H37Rv: protein-protein interaction between GlgB and WhiB1 involves exchange of thiol-disulfide
Source: PubMed Central journal article supplement (PMC2631452; doi:10.1186/1471-2091-10-1), 2009-01-05
Supplement: 1471-2091-10-1-S2.pdf [file 1471-2091-10-1-S2.pdf]

## Additional file 2

**Table 1. Protein disulfide reductase activity of TrxB and TrxC**

| Sample           | Reductase activity<br>( $\Delta A_{650} \times 10^{-3} \text{ min}^{-2}$ ) |
|------------------|----------------------------------------------------------------------------|
| TrxB (5 $\mu$ M) | 7.20                                                                       |
| TrxC (5 $\mu$ M) | 6.98                                                                       |
| Buffer control   | 0.57                                                                       |

The reductase activity was measured by insulin disulfide reduction assay as described for WhiB1.

**Table 2. List of primers used in this study**

| Primer's name          | Nucleotide sequence                                       |
|------------------------|-----------------------------------------------------------|
| <i>whiB1</i> /WT-Y2H-F | 5'-TCC <b>GGAATTC</b> ATGGATTGGCGCCAC-3'                  |
| <i>whiB1</i> /WT-Y2H-R | 5'-TTTCGCT <b>CGAGG</b> AGT CGTCAGACCC-3'                 |
| <i>whiB4</i> /WT-Y2H-F | 5'-ATATAT <b>GAATTC</b> GTGTCAGGAACCCGTCCAGCCG-3'         |
| <i>whiB4</i> /WT-Y2H-R | 5'-ATATAT <b>CTCGAG</b> CTATCCGGCGGTGCCGGTGC-3'           |
| <i>whiB1</i> /C40S/F   | 5' -TGTAATCGG <u>AGCC</u> CGGTCACCACAG- 3'                |
| <i>whiB1</i> /C40S/R   | 5' -CTCTGTGGTGACCGGGCTCCGATT-3'                           |
| <i>trxB</i> /WT/F      | 5'-ATATAT <b>GAATTC</b> GTGACTACCCGAGACCTCACTGCCGCACAG-3' |
| <i>trxB</i> /WT/R      | 5'-ATATAT <b>CTCGAGG</b> GCTTGTGGGCTCGCCCGTTCTGGGTG-3'    |
| <i>trxC</i> /WT/F      | 5'-ATATAT <b>GGATCC</b> ATGACCGATTCCGAGAAGTCCGCCAC-3'     |
| <i>trxC</i> /WT/R      | 5'-ATATATA <b>AGCTT</b> GTTGAGGTTGGGAACCACGTCTGAGAGCTC-3' |

Nucleotide sequences in bold letters are the restriction sites used for cloning, whereas the underlined sequence represent the mutated codon used to replace the cysteine to serine of WhiB1.
